# Supplementary material for: Common Marker Genes Identified from Various Sample Types for Systemic Lupus Erythematosus
Source: PLoS One. 2016 Jun 3;11(6):e0156234. doi: 10.1371/journal.pone.0156234 (PMC4892593; doi:10.1371/journal.pone.0156234)
Supplement: S2 Table — (XLSX) [file pone.0156234.s004.xlsx]

## Sheet: Sheet1
S2 Table : Top 100 Significant Genes Selected from Each Dataset by Fold-Change
Gene	GSE46907	GSE50772	GSE61635	GSE49454	* Count
IFI27	1	1	1	1	4
IFI44L	1	1	1	1	4
IFI6	1	1	1	1	4
OTOF	1	1	1	1	4
C1QB	1	1		1	3
CEACAM8	1	1		1	3
DEFA4	1	1		1	3
IFIT1	1	1		1	3
IFIT3	1	1		1	3
ISG15	1	1		1	3
LAMP3	1	1		1	3
LGALS3BP	1	1		1	3
LTF	1	1		1	3
LY6E	1	1		1	3
MX1	1	1		1	3
OASL	1	1		1	3
RNASE3	1	1		1	3
TNFAIP6	1	1		1	3
SERPING1	1		1	1	3
HBZ		1	1	1	3
CRISP3	1	1			2
CXCR1	1	1			2
FCGR3B	1	1			2
S100P	1	1			2
GAGE1	1		1		2
GRM3	1		1		2
SLC14A1	1		1		2
CD1C	1			1	2
CD38	1			1	2
CXCL10	1			1	2
FCER1A	1			1	2
GBP1	1			1	2
HERC6	1			1	2
IFIH1	1			1	2
IFIT5	1			1	2
MX2	1			1	2
OAS2	1			1	2
ZBP1	1			1	2
EIF1AY		1	1		2
GYPA		1	1		2
GYPB		1	1		2
INHBA		1	1		2
RPS4Y1		1	1		2
SLC4A1		1	1		2
TUBB2A		1	1		2
USP9Y		1	1		2
ARG1		1		1	2
BPI		1		1	2
CD163		1		1	2
CDC20		1		1	2
CEACAM1		1		1	2
CEACAM6		1		1	2
CTSG		1		1	2
ELANE		1		1	2
HP		1		1	2
MMP8		1		1	2
MPO		1		1	2
PRTN3		1		1	2
RNASE2		1		1	2
SLPI		1		1	2
TCN1		1		1	2
TK1		1		1	2
TYMS		1		1	2
ADAMTS5	1				1
AKR1B10	1				1
ALPP	1				1
ANKFY1	1				1
APOBEC3B	1				1
APOL6	1				1
ARID5B	1				1
BUB1B	1				1
CCL16	1				1
CD5L	1				1
CDON	1				1
CDY1	1				1
CHL1	1				1
CTF1	1				1
CUL1	1				1
CYP11A1	1				1
CYP7A1	1				1
DSP	1				1
EMP1	1				1
FKBP5	1				1
FOLR3	1				1
FOXM1	1				1
GCM1	1				1
GMPR	1				1
HCG4	1				1
HIST2H2BE	1				1
HSPB1	1				1
IFITM1	1				1
IFITM2	1				1
ISG20	1				1
KCNK3	1				1
KIAA0408	1				1
LGMN	1				1
LMO7	1				1
LPHN2	1				1
MS4A4A	1				1
MSI1	1				1
NDC80	1				1
NEBL	1				1
NEUROD1	1				1
NKX2-2	1				1
NR3C2	1				1
NRAP	1				1
OPTN	1				1
PLTP	1				1
POMC	1				1
PTGFR	1				1
RASGRP3	1				1
REN	1				1
RNF185	1				1
SKI	1				1
SLC16A4	1				1
SLC2A4RG	1				1
SPP1	1				1
STAP1	1				1
TAP1	1				1
TNFSF14	1				1
TPH1	1				1
UCN	1				1
VASH2	1				1
VIP	1				1
ZIC3	1				1
ZNF345	1				1
JUN		1			1
ADM		1			1
ADORA3		1			1
ALOX15B		1			1
ALPL		1			1
AMPH		1			1
AQP9		1			1
BIK		1			1
BMX		1			1
CA1		1			1
CCL20		1			1
CHIT1		1			1
COL9A3		1			1
CXCL1		1			1
CXCL2		1			1
CXCL3		1			1
CYP4F3		1			1
DDX3Y		1			1
DSC1		1			1
EGR1		1			1
EGR2		1			1
FN1		1			1
FOSB		1			1
FOSL1		1			1
GPR125		1			1
GPR97		1			1
HBD		1			1
HBEGF		1			1
IER3		1			1
IL1B		1			1
IL1R2		1			1
IL8		1			1
KCNJ2		1			1
MGAM		1			1
MME		1			1
MMP9		1			1
NAMPT		1			1
NFKBIA		1			1
ORM1		1			1
PGLYRP1		1			1
PPP1R15A		1			1
PTGS2		1			1
PTX3		1			1
RNASE1		1			1
RRM2		1			1
SGK1		1			1
SLC1A3		1			1
TNF		1			1
TNFRSF10C		1			1
TRIB1		1			1
VNN3		1			1
VSIG4		1			1
ADAM18			1		1
ADAMDEC1			1		1
ADIPOQ			1		1
ANKRD1			1		1
ATRNL1			1		1
BAI3			1		1
BCL2L1			1		1
BMP5			1		1
BRS3			1		1
C3orf51			1		1
C9			1		1
CCDC144A			1		1
CDH12			1		1
CDR1			1		1
CFHR4			1		1
CLGN			1		1
CNTN6			1		1
COL1A2			1		1
COL3A1			1		1
CTSE			1		1
CYLC2			1		1
DCLK1			1		1
DKFZp686O1327			1		1
EPB49			1		1
EPHA3			1		1
EPHA7			1		1
ERBB4			1		1
FAT1			1		1
FRK			1		1
GABRB2			1		1
GRM6			1		1
HEPH			1		1
HTR2A			1		1
ISL1			1		1
ITGBL1			1		1
KEL			1		1
KIAA0087			1		1
KRT1			1		1
LECT2			1		1
LPAR4			1		1
LPPR1			1		1
LRP2			1		1
MBL2			1		1
MEIS2			1		1
MGAT4C			1		1
NELL1			1		1
NLGN1			1		1
NOL4			1		1
NR2E1			1		1
PDZK1IP1			1		1
PGM5			1		1
PLCB4			1		1
PMP2			1		1
PPP1R3A			1		1
PROL1			1		1
PTPRD			1		1
PTPRG			1		1
RBMS3			1		1
RORB			1		1
RUNDC3A			1		1
SCN1A			1		1
SCN2A			1		1
SH3GL3			1		1
SHOX			1		1
SLC22A2			1		1
SLC6A8			1		1
SMR3B			1		1
SNCA			1		1
SOX11			1		1
SOX9			1		1
SPOCK3			1		1
SPTA1			1		1
STATH			1		1
SYCP1			1		1
TAC1			1		1
TLL1			1		1
TRPC3			1		1
TSPAN7			1		1
TSPAN8			1		1
WNT5A			1		1
ZFHX4			1		1
ZFY			1		1
ZNF208			1		1
ABCA1				1	1
ABLIM3				1	1
ACP5				1	1
ASGR2				1	1
ATP1B2				1	1
BLK				1	1
BST1				1	1
CCNB2				1	1
CCR1				1	1
CD19				1	1
CD40LG				1	1
CD79A				1	1
CD79B				1	1
CKAP4				1	1
COL17A1				1	1
CXCR5				1	1
CXCR6				1	1
EIF2AK2				1	1
ERLIN1				1	1
F5				1	1
FCER2				1	1
GINS2				1	1
GLDC				1	1
GNG7				1	1
GNLY				1	1
HLA-DOB				1	1
ID3				1	1
INSL3				1	1
JAK2				1	1
LGALS9				1	1
MAOA				1	1
MS4A3				1	1
OAS1				1	1
PASK				1	1
PLSCR1				1	1
SAP30				1	1
SCO2				1	1
SLC2A5				1	1
SPTLC2				1	1
STARD8				1	1
TACSTD2				1	1
TCN2				1	1
TIMM10				1	1
TLR2				1	1
TMCC2				1	1
TNFSF10				1	1
TOP2A				1	1
TRAFD1				1	1
TYMP				1	1
VNN1				1	1
XAF1				1	1
XK				1	1
Note: the number "1" under each dataset represents the gene is among top 100 significant genes, while the blank not.
* Count represents the number of dataset where the gene is selected as top 100 significant.
